# Supplementary material
Source: Research Square preprint supplement (doi:10.21203/rs.3.rs-8901204/v1)
Supplement: Supplementary file 1 [file 510831671e9a8bc8d06f95a8.docx]

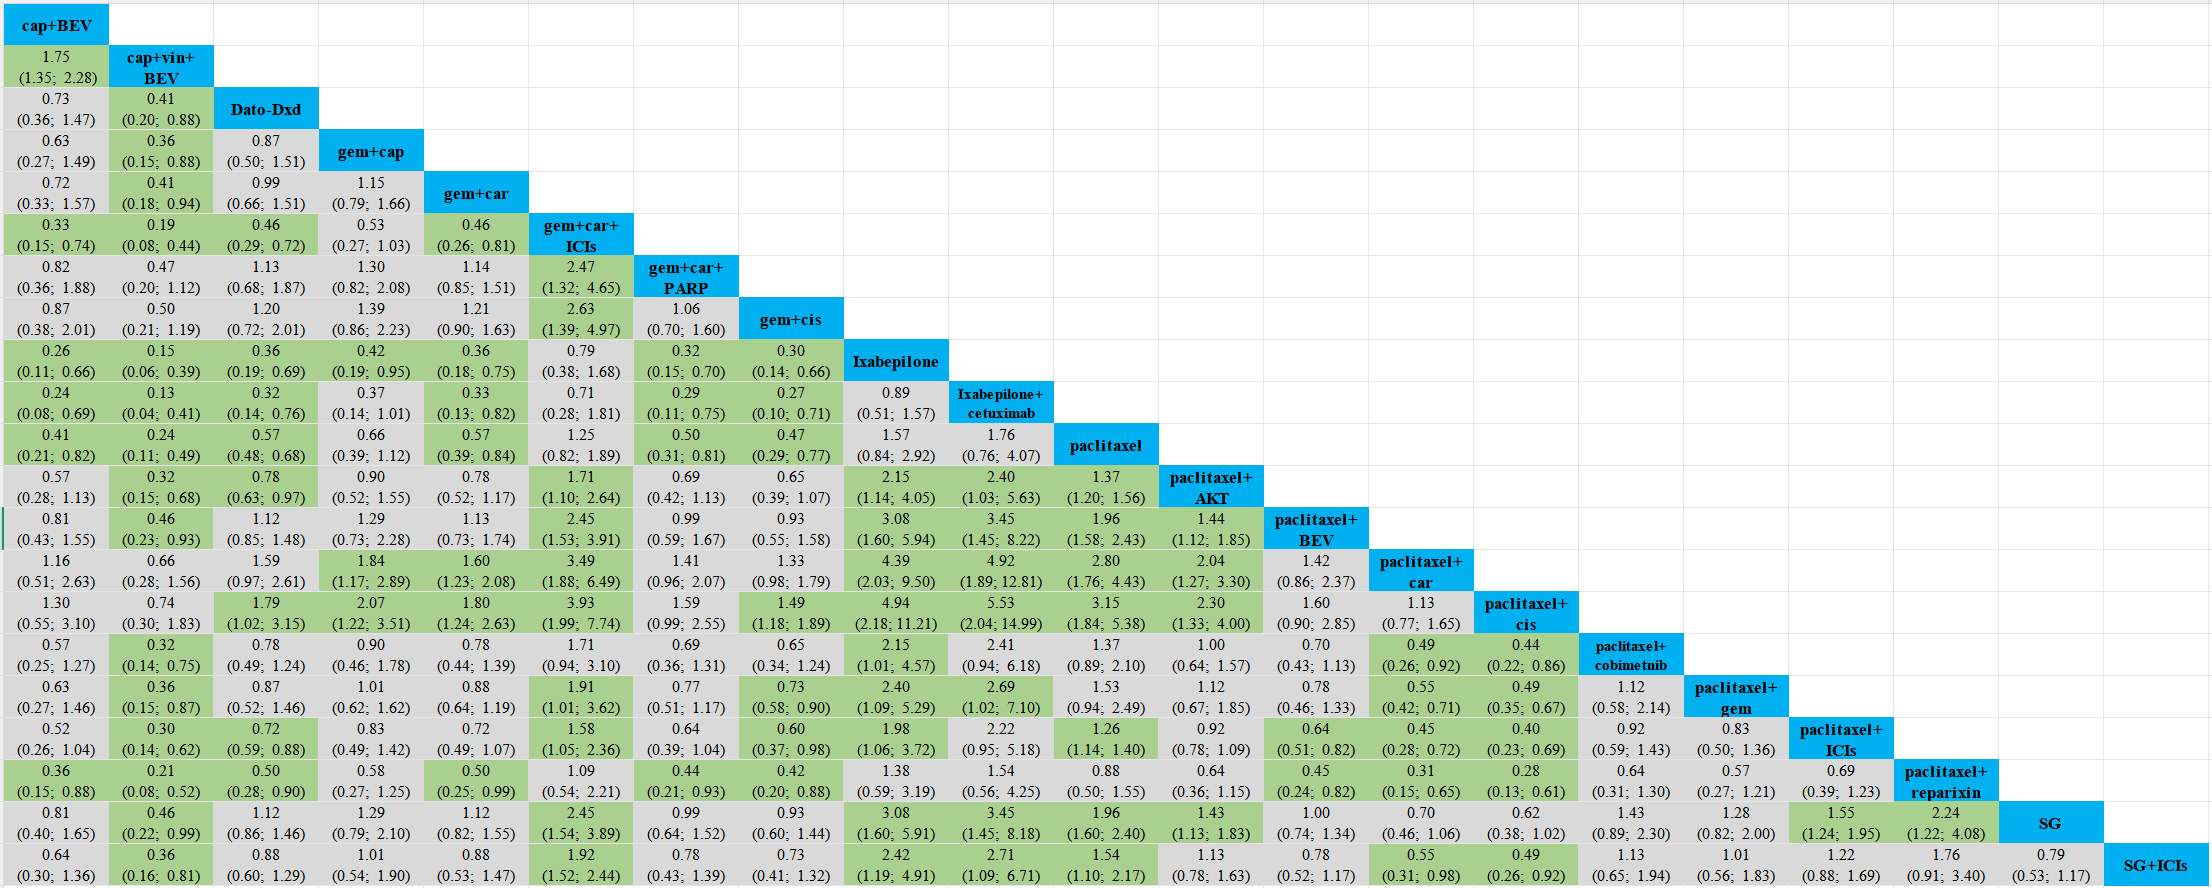


Table 2. Cross-comparison of PFS in populations. The results after making comparisons of the treatment regimens in each row and column are shown as HR and 95% CI results, and results with p < 0.05 are highlighted in light green.
