# Supplementary material
Source: Research Square preprint supplement (doi:10.21203/rs.3.rs-8901204/v1)
Supplement: Supplementary file 2 [file 6d5bd206083c2bfad63ff0fd.docx]

A


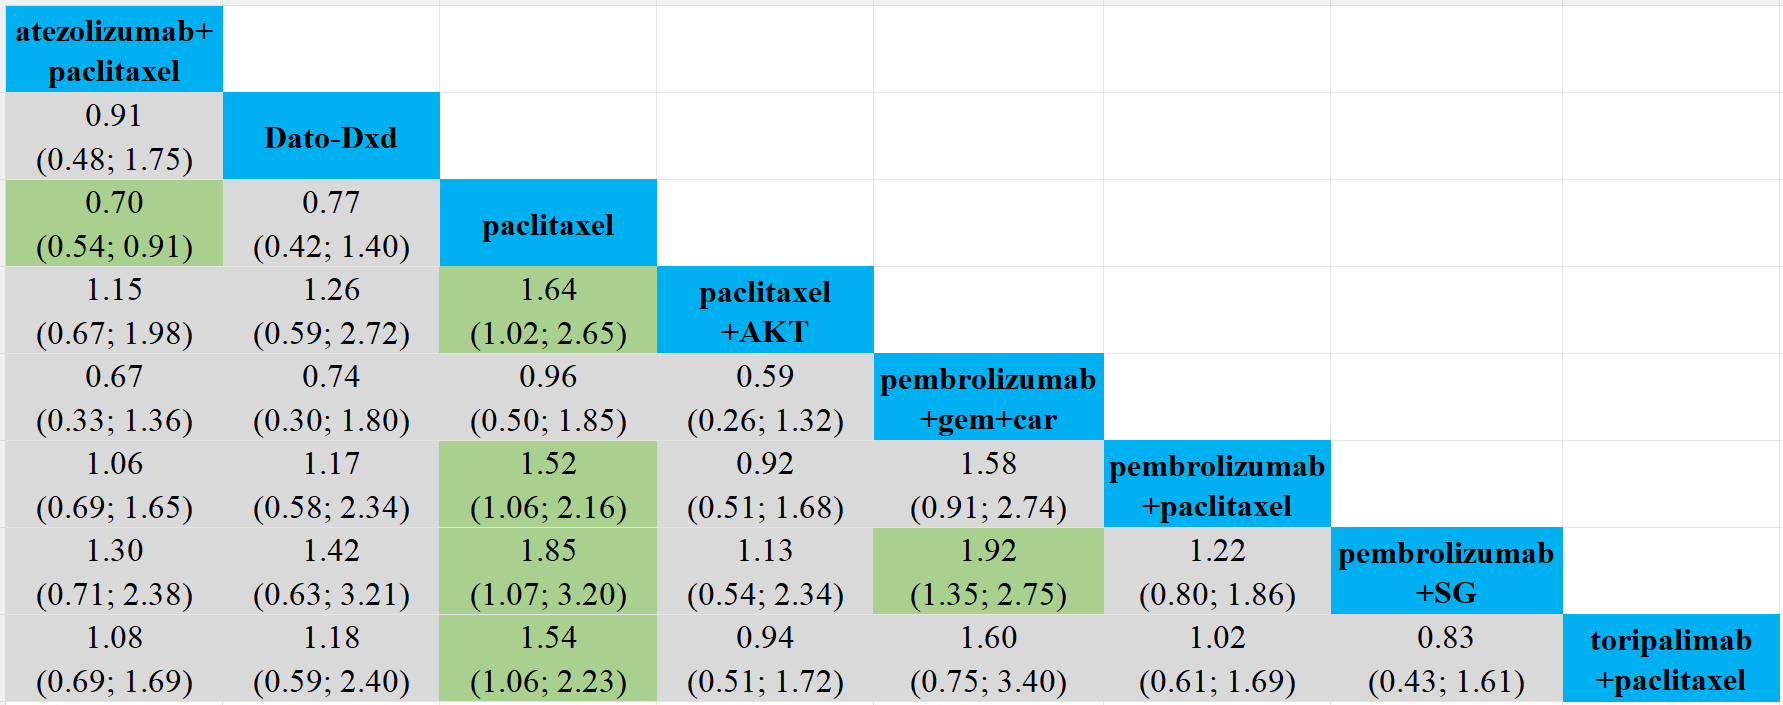


B


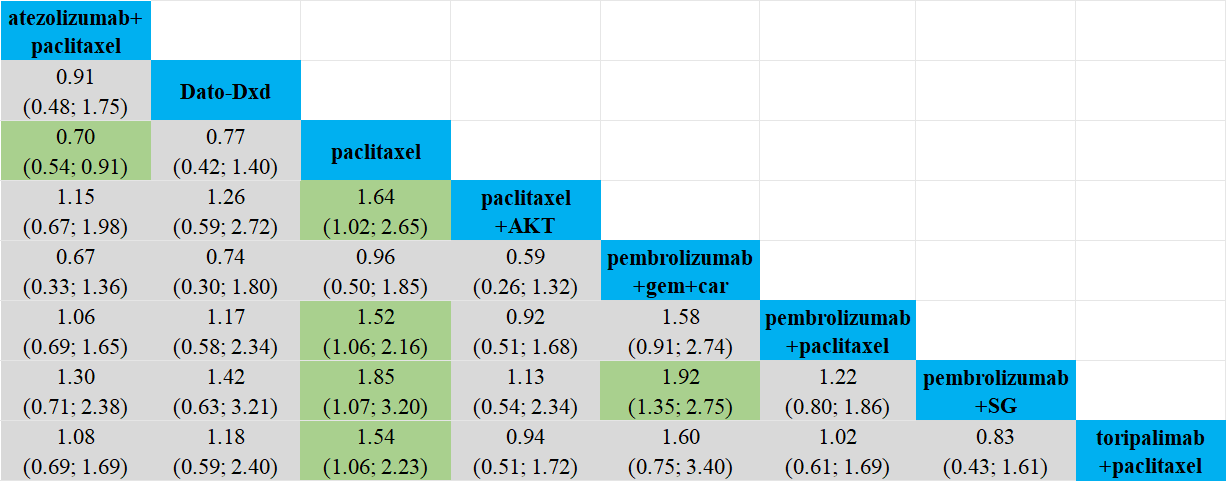


C


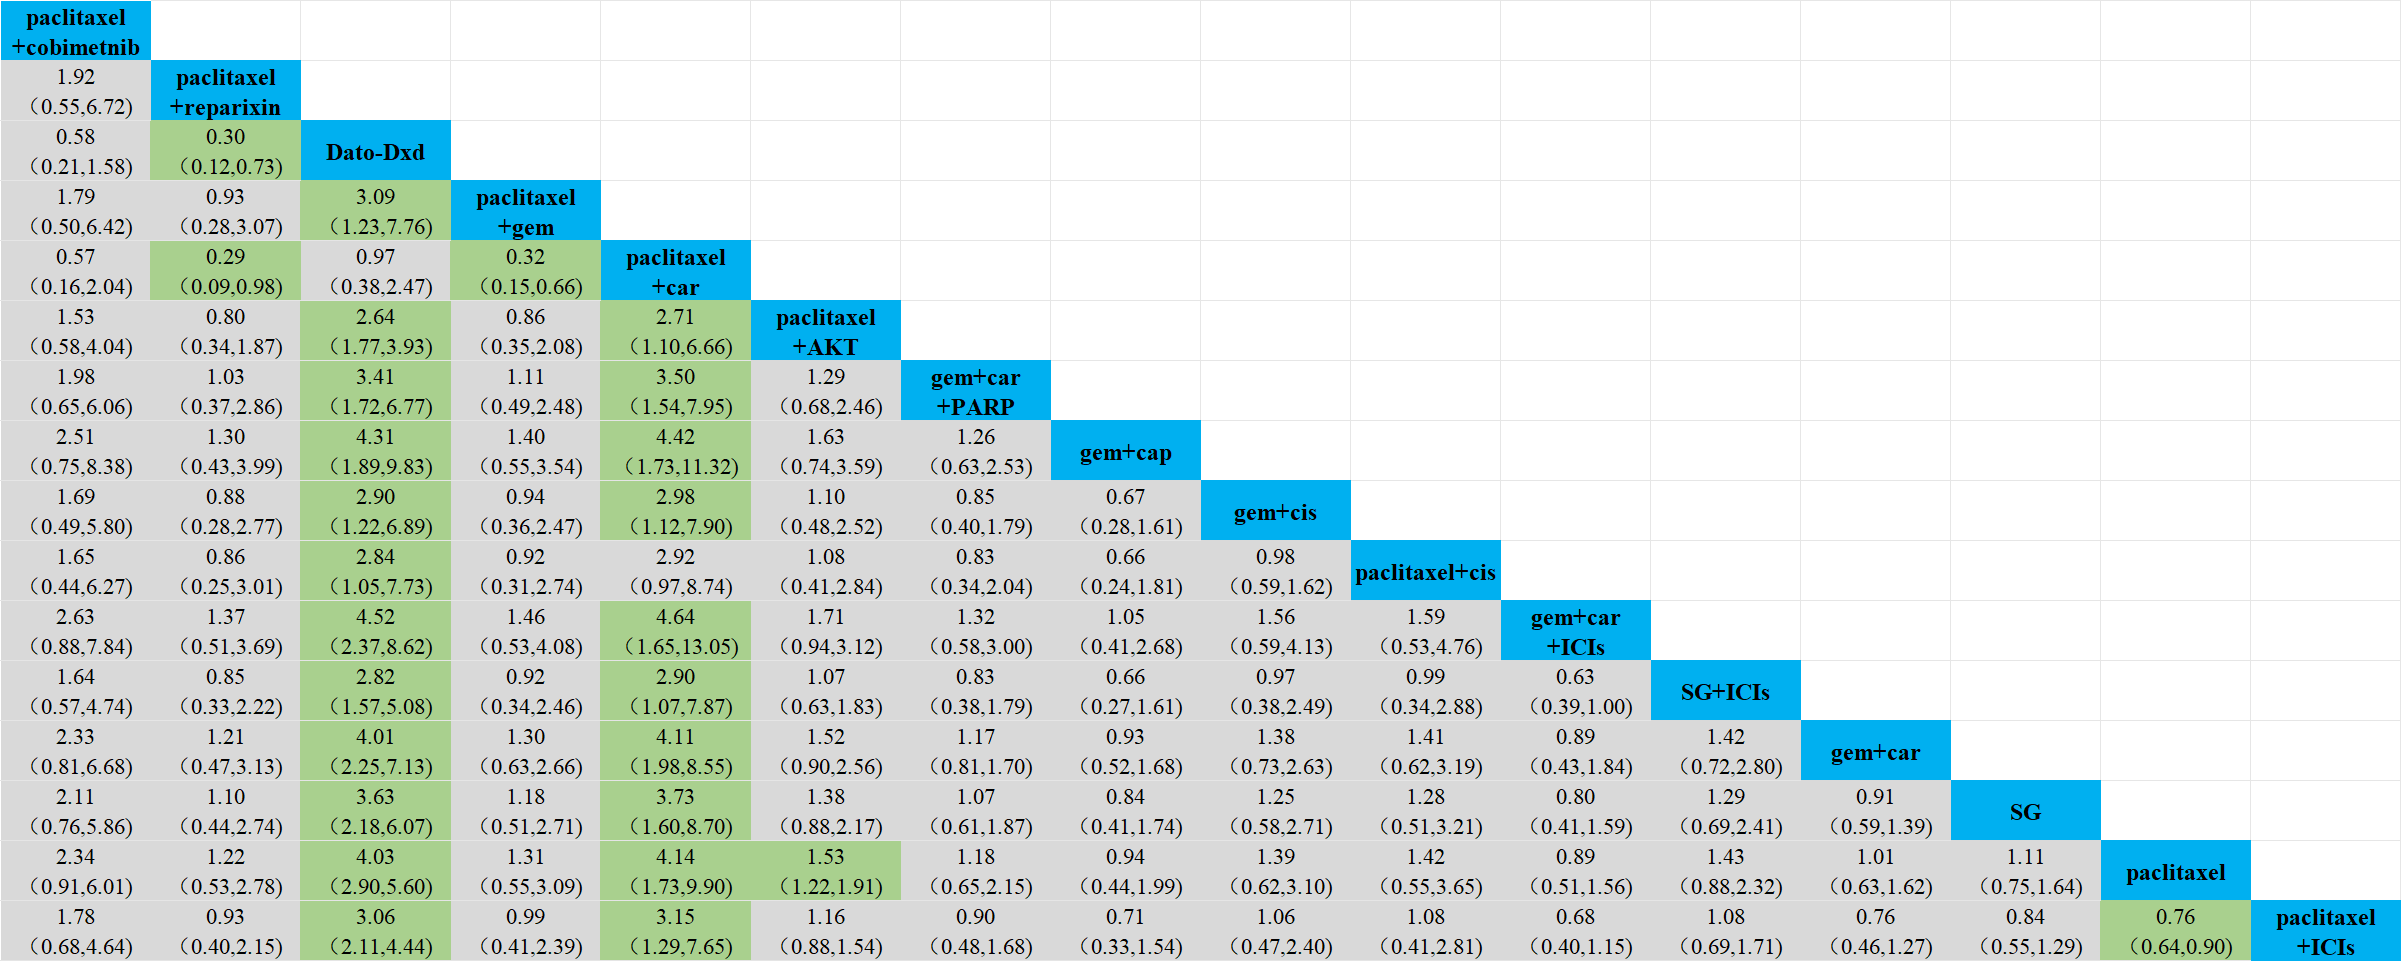


D


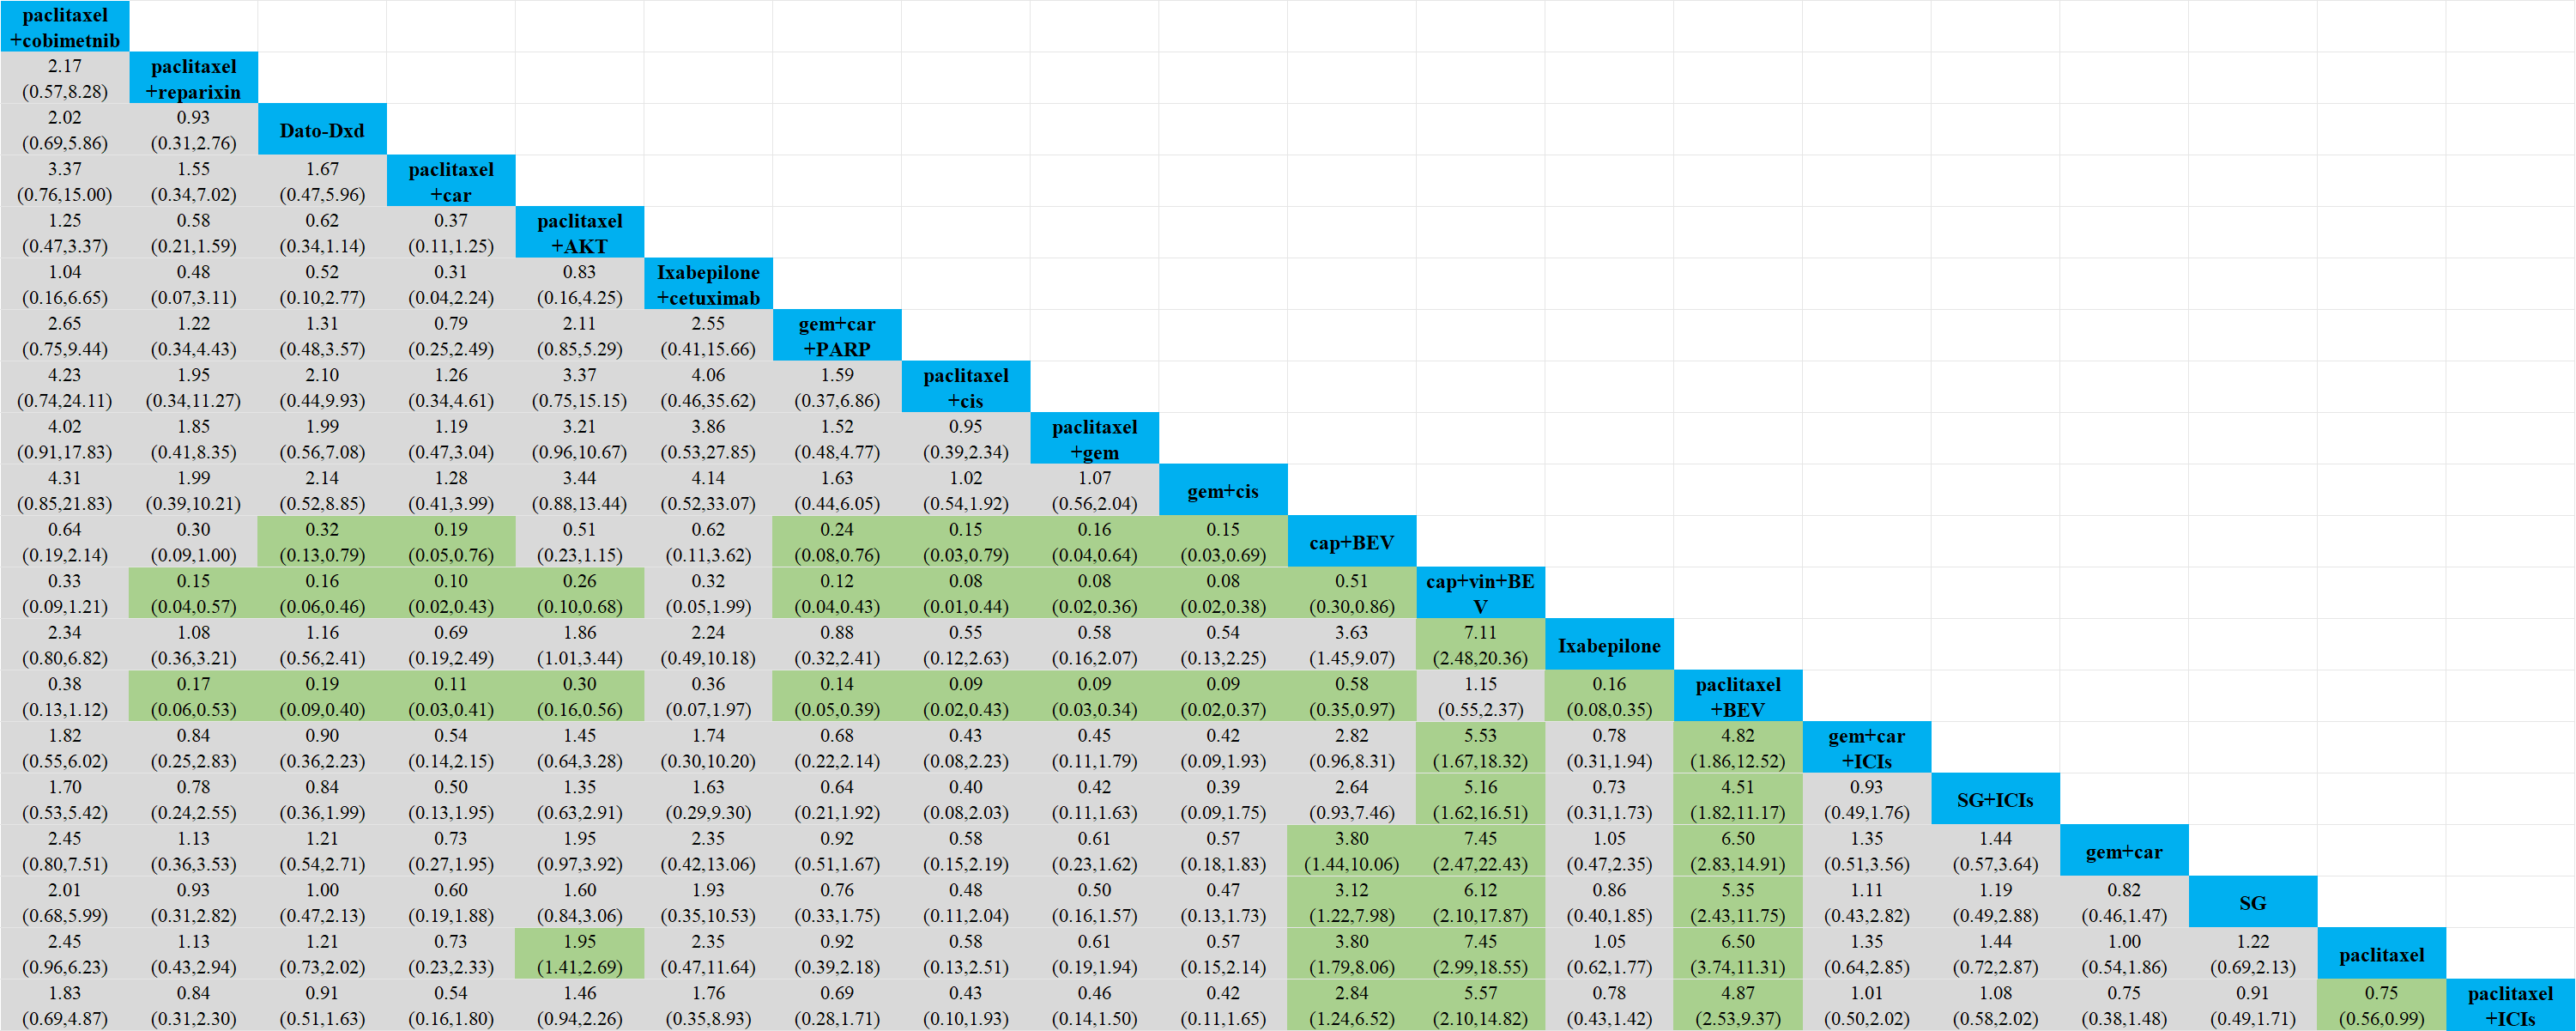


**Supplemental File G:** Cross-comparison of each endpoints. A. PFS of PD-L1 positive populations. The results after making comparisons of the treatment regimens in each row and column are shown as HR and 95% CI results, and results with p < 0.05 are highlighted in light green. A. OS of overall populations. The results after making comparisons of the treatment regimens in each row and column are shown as HR and 95% CI results, and results with p < 0.05 are highlighted in light green. C. ORR of overall populations. The results after making comparisons of the treatment regimens in each row and column are shown as OR and 95% CI results, and results with p < 0.05 are highlighted in light green. D. ≥3 AEs of overall populations. The results after making comparisons of the treatment regimens in each row and column are shown as OR and 95% CI results, and results with p < 0.05 are highlighted in light green.
