# Supplementary material
Source: Research Square preprint supplement (doi:10.21203/rs.3.rs-8901204/v1)
Supplement: Supplementary file 3 [file 7a4f3e7722cca08c2dbc1586.docx]

**A**

Buisseret L, Loirat D, Aftimos P, et al. Paclitaxel plus carboplatin and durvalumab with or without oleclumab for women with previously untreated locally advanced or metastatic triple-negative breast cancer: the randomized SYNERGY phase I/II trial. *Nat Commun*. 2023;14(1):7018. Published 2023 Nov 2. doi:10.1038/s41467-023-42744-y

**B**

Rodler E, Sharma P, Barlow WE, et al. Cisplatin with veliparib or placebo in metastatic triple-negative breast cancer and BRCA mutation-associated breast cancer (S1416): a randomised, double-blind, placebo-controlled, phase 2 trial. *Lancet Oncol*. 2023;24(2):162-174. doi:10.1016/S1470-2045(22)00739-2

**C**

Fan Y, Xu BH, Yuan P, et al. Docetaxel-cisplatin might be superior to docetaxel-capecitabine in the first-line treatment of metastatic triple-negative breast cancer. *Ann Oncol*. 2013;24(5):1219-1225. doi:10.1093/annonc/mds603

**Supplemental File D:** Excluded Clinical Studies. The above are three excluded studies. The treatment regimens used in the experimental and control groups cannot form a complete network with most other regimens, making a network meta-analysis impossible.
