# Supplementary material
Source: Research Square preprint supplement (doi:10.21203/rs.3.rs-8901204/v1)
Supplement: Supplementary file 4 [file 866dd441cf3d0e1dace99743.docx]

A


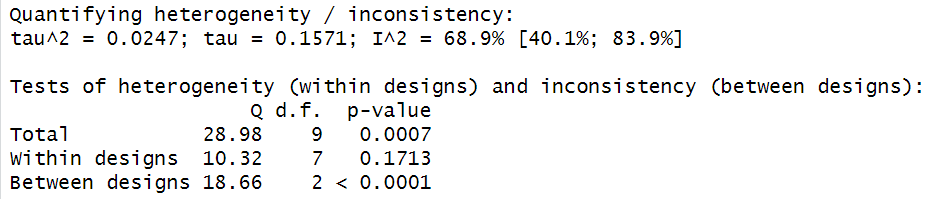


B


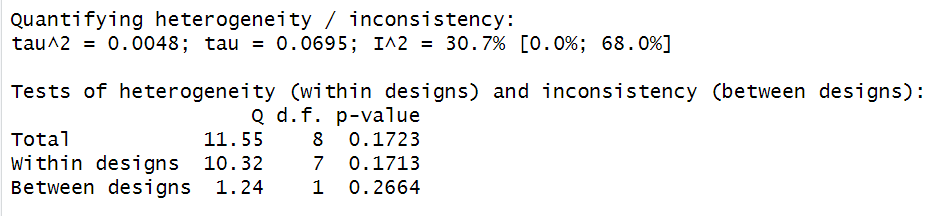


**Supplemental File F:** Analysis of heterogeneity and inconsistency: A. Analysis results including the IMpassion132 study; B. Analysis results excluding the IMpassion132 study.
