# Supplementary material
Source: Research Square preprint supplement (doi:10.21203/rs.3.rs-8901204/v1)
Supplement: Supplementary file 5 [file 9581bade0f5218df8cab38ed.docx]

1. The original SUCRA values (Figure 5A, Figure 5E).

|  | PFS | ≥3AE |
| --- | --- | --- |
| paclitaxel+cis | 92.74 | 81.7 |
| paclitaxel+car | 89 | 75.9 |
| gem+cis | 72.74 | 83.8 |
| gem+car+PARP | 68.22 | 68.7 |
| paclitaxel+gem | 44.89 | 82.9 |
| SG | 69 | 53 |
| gem+car | 56.92 | 64.9 |
| Dato-Dxd | 58.49 | 54.6 |
| cap+vin+BEV | 96.81 | 2.9 |
| SG+ICIs | 47.79 | 44.3 |
| cap+BEV | 76.98 | 14.5 |
| paclitaxel | 17.76 | 68.5 |
| paclitaxel+ICIs | 30.54 | 47.4 |
| paclitaxel+reparixin | 15.33 | 58 |
| paclitaxel+BEV | 68.63 | 4.3 |
| Ixabepilone | 6.65 | 63.3 |
| paclitaxel+AKT | 37.32 | 27.6 |
| paclitaxel+cobimetnib | 38.86 | 24.8 |
| gem+car+ICIs | 10.83 | 48.5 |
| Ixabepilone+cetuximab | 5.32 | 30.4 |

1. Scenario A (PFS,50% and AE,50%):


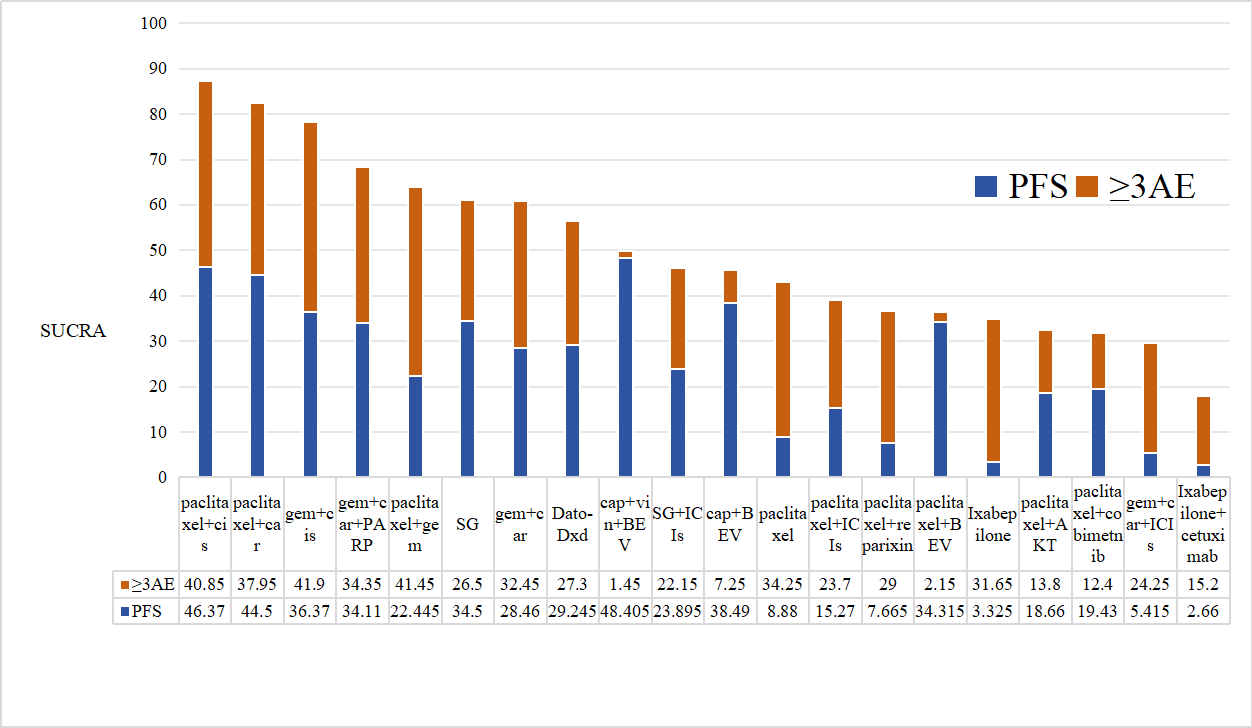


1. Scenario B (PFS,30% and AE,70%):


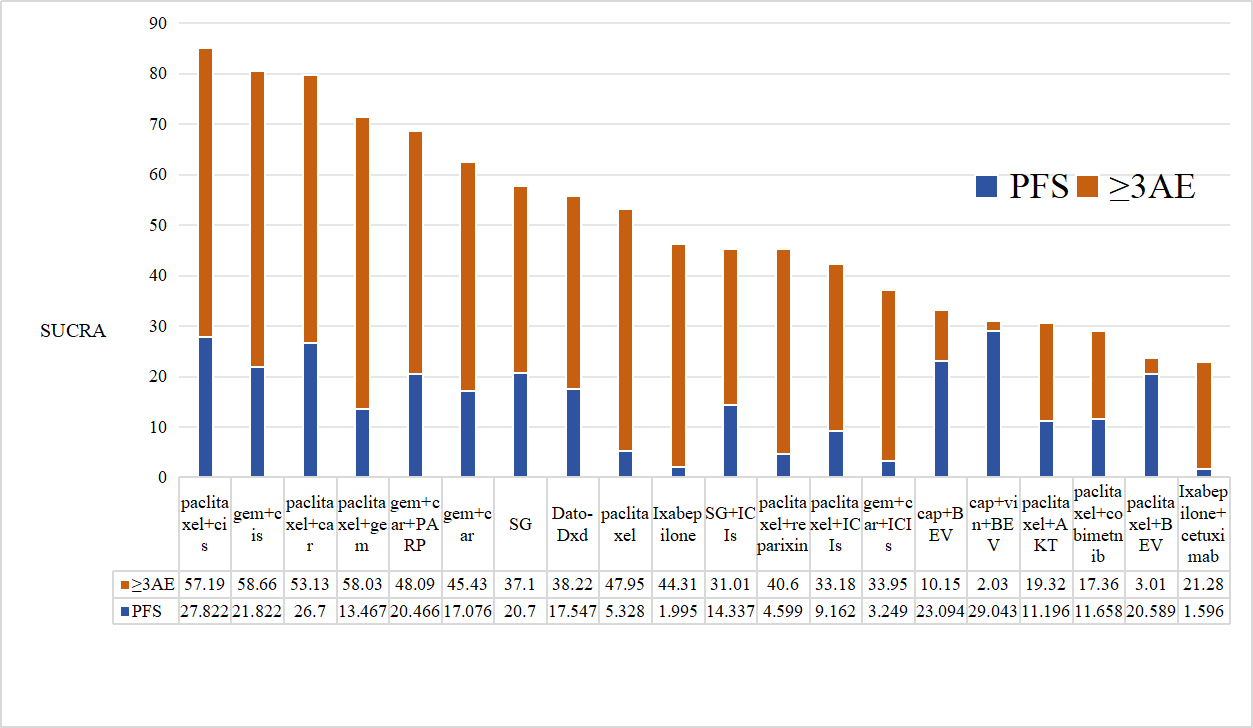


1. Scenario C (PFS,70% and AE,30%):


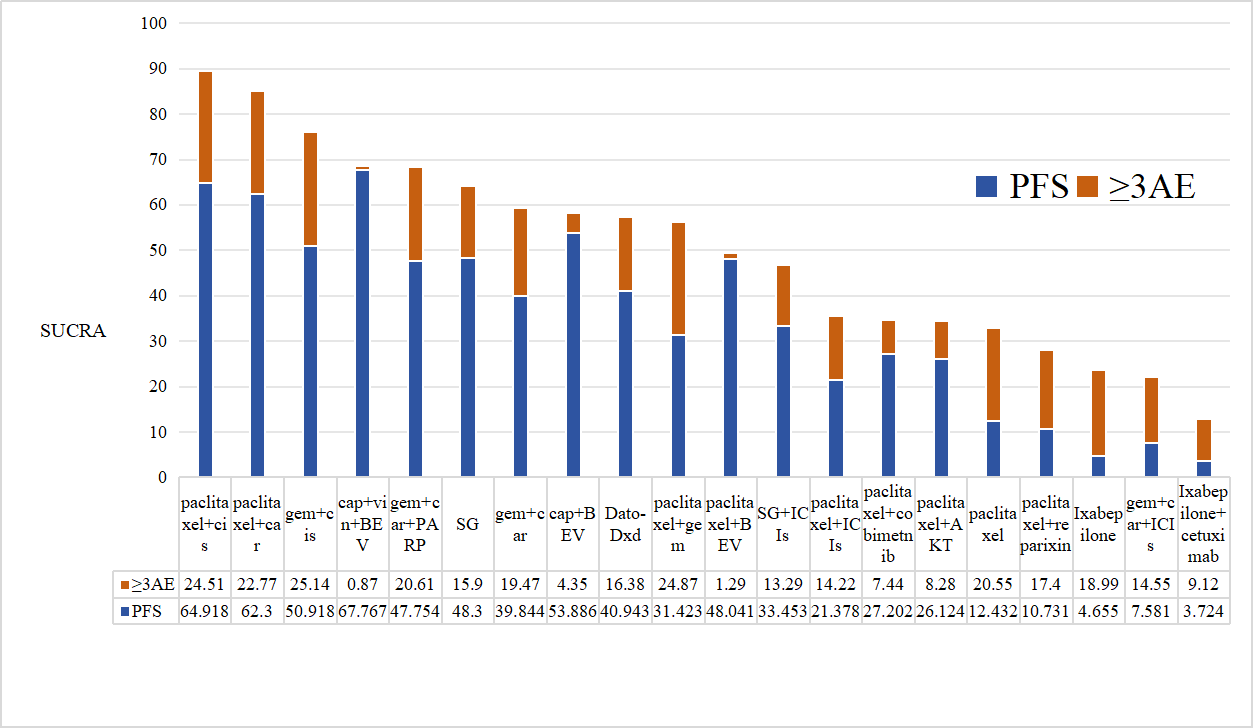


**Supplemental File H:** Sensitivity analysis of PFS combined with grade ≥3 AEs: A. Original SUCRA values; B. PFS weighted at 50% and grade ≥3 AEs weighted at 50%; C. PFS weighted at 30% and grade ≥3 AEs weighted at 70%; D. PFS weighted at 70% and grade ≥3 AEs weighted at 30%.
