# Supplementary material
Source: Research Square preprint supplement (doi:10.21203/rs.3.rs-8901204/v1)
Supplement: Supplementary file 6 [file bf76adde238085f48ed42945.xlsx]

## Sheet: Sheet1
NO	Trail name	Title	Author	Magezines/Meeting	Year	Treatment	HR status	lines	PD-L1 Status	NO.		HR for PFS in ITT	NO.		HR for PFS in PD-L1+	HR for PFS in PD-L1-	NO.	HR for OS in ITT	HR for OS in PD-L1+	HR for OS in PD-L1-	AE≥3	ORR
1	IMpassion130	First-line atezolizumab plus nab-paclitaxel for unresectable, locally advanced, or metastatic triple-negative breast cancer: IMpassion130 final overall survival analysis	L. A. Emens	Annol of Oncology	2021	Atezolizumab+nab-paclitaxel	Negative	First	Positive/Negative	451		0.80（0.69-0.92）	185		0.63（0.50-0.79）	0.93（0.77-1.11）	451	0.87（0.75-1.02）	0.67（0.53-0.86）	1.02（0.84-1.24）	230/453	252/453
						Placebo+nab-paclitaxel				451			184				451				190/437	206/437
2	KEYNOTE355	Pembrolizumab plus Chemotherapy in Advanced Triple-Negative Breast Cancer	J. Cortes	The new england journal o f medicine	2022	Pembrolizumab+nab-paclitaxel	Negative	First	Positive/Negative	566		0.82（0.70-0.98）	220		0.66（0.50-0.88）	0.75（0.62-0.91）	566	0.89（0.76-1.05）	0.73（0.55-0.95）	0.86（0.72-1.04）	438/562	231/566
						Placebo + nab-paclitaxel				281			103				281				207/281	104/281
3	ASCENT03	Sacituzumab Govitecan in Untreated, Advanced Triple-Negative Breast Cancer	J. Cortés	The new england journal o f medicine	2025	Sacituzumab	Negative	First	Positive/Negative	154	125										181/275	134/279
						nab-paclitaxel/paclitaxel				155		0.51（0.38-0.68）									171/276	128/279
						gemcitabine+carboplatin					124	0.89（0.64-1.22）
4	ASCENT04	Sacituzumab Govitecan Plus Pembrolizumab vs ChemotherapyPlus Pembrolizumab in Patients With Previously Untreated,PD-L1 Positive,Advanced or Metastatic Triple-Negative BreastCancer:Primary Results From the Randomized,Phase 3ASCENT-04/KEYNOTE-D19 Study	Sara M Tolaney	ASCO	2025	Sacituzumab+pembrolizumab	Negative	First	Positive	116	105		221						0.89（0.62-1.29）		158/221	132/221
						nab-paclitaxel/paclitaxel+pembrolizumab				114			114		0.82（0.58-1.17）						154/220	118/222
						gemcitabine+carboplatin+pembrolizumab					108		108		0.52（0.36-0.75）
5	BOOG 2013-01	Carboplatin-Cyclophosphamide or Paclitaxel without or with Bevacizumab as First-Line Treatment for Metastatic Triple-Negative Breast Cancer (BOOG 2013-01)	Annelot G.J. van Rossum	Breast Care	2021	CC: Carboplatin+cyclophosphamide	Negative	First	Positive/Negative	13		chemo+bevacizumab VS chemo:0.60（0.33-1.08） CC+B VS CC:0.45（0.18-1.10） P+B VS P:0.74（0.32-1.70）					13	chemo+bevacizumab VS chemo:0.88（0.46-1.69） CC+B VS CC:0.91（0.27-3.13） P+B VS P:0.59（0.23-1.55）			6/14
						CC+B: Carboplatin+cyclophosphamide+bevacizumab				15							14				8/13
						P: Paclitaxel				15							15				3/15
						P+B: Paclitaxel+bevacizumab				15							15				4/15
6	CALGB40502	Randomized Phase III Trial of Paclitaxel Once Per Week Compared With Nanoparticle Albumin-Bound Nab-Paclitaxel Once Per Week or Ixabepilone With Bevacizumab As First-Line Chemotherapy for Locally Recurrent or Metastatic Breast Cancer: CALGB 40502/NCCTG N063H (Alliance)	Hope S. Rugo	JOURNAL OF CLINICAL ONCOLOGY	2015	Paclitaxel	Positive/Negative	First	Positive/Negative	197		ixabepilone VS paclitaxel:1.57(1.08-2.29) nab-paclitaxel VS paclitaxel:0.86(0.60-1.25)									162/272
						Nab-paclitaxel															221/263
						Ixabepilone				223											145/239
7	CARIN	Capecitabine and bevacizumab with or without vinorelbine in first-line treatment of HER2/neu-negative metastatic or locally advanced breast cancer: final efficacy and safety data of the randomised, open-label superiority phase 3 CARIN trial	A. Welt	Breast Cancer Res Treat	2016	Capecitabine+bevacizumab+vinorelbine	Positive/Negative	First	Positive/Negative	61		0.57（0.39-0.84）									216/295
						Capecitabine+bevacizumab				61											173/297
8	CBCSG006	Cisplatin plus gemcitabine versus paclitaxel plus gemcitabine as fi rst-line therapy for metastatic triple-negative breast cancer (CBCSG006): a randomised, open-label, multicentre, phase 3 trial	Xi-Chun Hu	lancet Oncol	2015	Cisplatin+gemcitabine	Negative	First	Positive/Negative	118		0.692（0.523-0.915）					118	0.902（0.605-1.344）			67/118
						Paclitaxel+gemcitabine				118							118				69/118
9	E2100	Independent Review of E2100: A Phase III Trial of Bevacizumab Plus Paclitaxel Versus Paclitaxel in Women With Metastatic Breast Cancer	Robert Gray	JOURNAL OF CLINICAL ONCOLOGY	2009	Paclitaxel+bevacizumab	Positive/Negative	First	Positive/Negative	121		0.49（0.34-0.70）									296/365
						paclitaxel				111											127/346
10	CBCSG018	A randomized phase 3 trial of Gemcitabine or Nab-paclitaxel combined with cisPlatin as first-line treatment in patients with metastatic triple-negative breast cancer	Biyun Wang	Nature communications	2022	Nab-paclitaxel+cisplatin	Negative	First	Positive/Negative	127		0.67（0.50-0.88）					127	0.62（0.44-0.90）			52/127	103/127
						Gemcitabine+cisplatin				126							126				51/126	71/126
11		A non-inferiority, phase III trial of gemcitabine plus capecitabine versus gemcitabine plus carboplatin as first-line therapy and tumor-infiltrating lymphocytes as a prognostic biomarker in patients with advanced triple-negative breast cancer	Xiaodong Liu	Therapeutic Advances in Medical Oncology	2024	Gemcitabine+capecitabine	Negative	First	Positive/Negative	93		1.148（0.856-1.539）					93	1.002（0.717-1.400）			28/93	35/93
						Gemcitabine+carboplatin				94							94				48/94	37/94
12	IMpassion131	Primary results from IMpassion131, a double-blind, placebo-controlled, randomised phase III trial of first-line paclitaxel with or without atezolizumab for unresectable locally advanced/metastatic triple-negative breast cancer	D. Miles	Annol of Oncology	2021	Atezolizumab+paclitaxel	Negative	First	Positive/Negative	431		0.86（0.70-1.05）	191		0.82（0.60-1.12）		431	1.12（0.88-1.43）	1.11（0.76-1.64）		49/432	186/431
						Placebo+paclitaxel				220			101				220				11/217	78/219
13	IMpassion132	IMpassion132 double-blind randomised phase III trial of chemotherapy with or without atezolizumab for early relapsing unresectable locally advanced or metastatic triple-negative breast cancer	R. Dent	Annol of Oncology	2024	atezolizumab+gemcitabine+carboplatin	Negative	First	Positive/Negative	130			130		0.72（0.56-0.94）		130		0.81（0.61-1.09）
						gemcitabine+carboplatin				130			130				130
						atezolizumab+capecitabine				47			47		1.28（0.84-1.97）		47		1.41（0.87-2.29）
						capecitabine				47			47				47
14		Phase III Study of Iniparib Plus Gemcitabine and Carboplatin Versus Gemcitabine and Carboplatin in Patients With Metastatic Triple-Negative Breast Cancer	Joyce O’Shaughnessy	JOURNAL OF CLINICAL ONCOLOGY	2014	Gemcitabine+carboplatin+iniparib	Negative	First/Second	Positive/Negative	148		0.88（0.67-1.17）					148	1.11（0.78-1.57）			207/255	88/261
						Gemcitabine+carboplatin				149							149				201/244	78/258
15		Ixabepilone Alone or With Cetuximab as First-Line Treatment for Advanced/Metastatic Triple-Negative Breast Cancer	Olivier Trédan	Clinical Breast Cancer	2015	Ixabepilone+cetuximab	Negative	First	Positive/Negative	39		1.12（0.69-1.79）									6/39	14/39
						Ixabepilone				40											3/40	12/40
16	PAKT	Capivasertib Plus Paclitaxel Versus Placebo Plus Paclitaxel As First-Line Therapy for Metastatic Triple-Negative Breast Cancer: The PAKT Trial	Peter Schmid	JOURNAL OF CLINICAL ONCOLOGY	2019	Capivasertib+paclitaxel	Negative	First	Positive/Negative	70		0.74（0.50-1.08）					70	0.61（0.37-0.99）			37/68	23/66
						Placebo+paclitaxel				70							70				18/70	19/66
17	tnAcity	nab-Paclitaxel plus carboplatin or gemcitabine versus gemcitabine plus carboplatin as first-line treatment of patients with triple-negative metastatic breast cancer: results from the tnAcity trial	D. A. Yardley	Annol of Oncology	2018	Nab-paclitaxel+carboplatin	Negative	First	Positive/Negative	64	64	Nab/c VS Nab/g: 0.59（0.38-0.92） Nab/c VS g/c: 0.58（0.37-0.90）					64	Nab/c VS Nab/g: 0.73（0.47-1.13） Nab/c VS g/c: 0.80（0.52-1.22）			51/64	44/64
						Nab-paclitaxel+gemcitabine				61							61				46/60	25/61
						Gemcitabine+carboplatin					66						66				54/64	23/66
18	TROPION-Breast02	First-line datopotamab deruxtecan (Dato-DXd) vs chemotherapy in patients with locally recurrent inoperable or metastatic triple-negative breast cancer (TNBC) for whom immunotherapy was not an option: Primary results from the randomised, phase 3 TROPION-Breast02 trial	Rebecca A. Dent	ESMO	2025	Dato-Dxd	Negative	First	Positive/Negative	323		0.57（0.47-0.69）	34		0.77（0.41-1.45）	0.53（0.43-0.65）	323	0.79（0.64-0.98）	0.77（0.39-1.50）	0.77（0.61-0.96）	105/319	202/323
						Paclitaxel, nab-paclitaxel, capecitabine, eribulin, carboplatin				321			29				321				89/309	94/321
19	TURANDOT	Bevacizumab plus paclitaxel versus bevacizumab plus capecitabine as fi rst-line treatment for HER2-negative metastatic breast cancer (TURANDOT): primary endpoint results of a randomised, open-label, non-inferiority, phase 3 trial	Christoph Zielinski	lancet Oncol	2016	Bevacizumab+paclitaxel	Positive/Negative	First	Positive/Negative	63		1.23（0.75-2.01）					60	1.35（0.90-2.02）			166/284
						Bevacizumab+capecitabine				64							64				125/277
20	TORCHLIGHT	Toripalimab plus nab-paclitaxel in metastatic or recurrent triple-negative breast cancer: a randomized phase 3 trial	Zefei Jiang	Nature Medicine	2024	Toripalimab+nab-paclitaxel	Negative	First	Positive	353		0.650（0.470-0.906）	200		0.650（0.470-0.906）		353	0.62（0.414-0.914）	0.62（0.414-0.914）		199/353
						Placebo+nab-paclitaxel				178			100				178				97/178
21	IPATunity130	Ipatasertib plus Paclitaxel for Patients with PIK3CA/AKT1/PTEN-Altered Locally Advanced Unresectable or Metastatic Triple-Negative Breast Cancer in the IPATunity130 Phase III Trial	Rebecca A. Dent	CLINICAL CANCER RESEARCH	2024	Ipatasertib+paclitaxel	Negative	First	Positive/Negative	168		1.02（0.71-1.45）	48		0.61（0.34-1.09）	0.44（0.78-2.65）	168	1.08（0.73-1.58）			84/166	66/168
						Placebo+paclitaxel				87			35				87				40/87	30/87
22	LOTUS	Final results of the double‑blind placebo‑controlled randomized phase 2 LOTUS trial of first‑line ipatasertib plus paclitaxel for inoperable locally advanced/metastatic triple‑negative breast cancer	Rebecca Dent	Breast Cancer Research and Treatment	2021	Ipatasertib+paclitaxel	Negative	First	Positive/Negative	62		0.60（0.37-0.98）					62	0.80（0.50-1.28）			33/61	25/62
						Placebo+paclitaxel				62							62				26/62	20/62
23	fRida	A randomized, placebo‑controlled phase 2 study of paclitaxel in combination with reparixin compared to paclitaxel alone as front‑line therapy for metastatic triple‑negative breast cancer (fRida)	Lori J. Goldstein	Breast Cancer Research and Treatment	2021	Paclitaxel+reparixin	Negative	First	Positive/Negative	62		1.14（0.71-1.81）					62	1.09（0.68-1.75）			13/61	16/61
						Placebo+paclitaxel				61							61				12/62	14/62
24	COLET	A phase II randomized trial of cobimetinib plus chemotherapy, with or without atezolizumab, as first-line treatment for patients with locally advanced or metastatic triple-negative breast cancer (COLET): primary analysis	A. Brufsky	Annol of Oncology	2021	Cobimetnib+paclitaxel	Negative	First	Positive/Negative	47		0.73（0.43-1.24）					47	1.05（0.55-1.01）			31/47	18/47
						Placebo+paclitaxel				43							43				19/43	9/43
25		A phase II randomized trial of gemcitabine plus cisplatin(GP) vs gemcitabine plus carboplatin (GC) as the first-line treatment for patients with metastatic triple-negative breast cancer	Chengcheng Gong	Cancer research	2024	Gemcitabine+cisplatin	Negative	First	Positive/Negative	75		0.93（0.64-1.34）					75	1.13（0.77-1.67）				37/75
						Gemcitabine+carboplatin				75							75					31/75
26	CAPItello290	Capivasertib plus paclitaxel as first-line treatment for metastatic triple-negative breast cancer: Results from the randomised, global phase III CAPItello-290 trial	P.S. Schmid	Annol of Oncology	2025	Capivasertib+paclitaxel	Negative	First	Positive/Negative	404		0.72（0.61-0.84）					404	0.92（0.78-1.08）			233/402	210/402
						Placebo+paclitaxel				408							408				156/407	161/407
