# Supplementary material
Source: Research Square preprint supplement (doi:10.21203/rs.3.rs-8901204/v1)
Supplement: Supplementary file 7 [file ce0a1c79d3678a8301758894.docx]

****Supplemental File C: Categorization of drugs by therapeutic class.****

| Therapeutic Class | Drugs |
| --- | --- |
| Paclitaxel | Paclitaxel, nab-paclitaxel |
| ICIs | Atezolizumab, Pembrolizumab, Toripalimab |
| PARP Inhibitor | Iniparib |
| AKT Inhibitor | Capivasertib, Ipatasertib |
| Non-paclitaxel | Gemcitabine+cisplatin, Gemcitabine+carboplatin, capecitabine, |
